# Supplementary material for: The Effects of Repeated Low-Level Red-Light Therapy on the Structure and Vasculature of the Choroid and Retina in Children with Premyopia
Source: PubMed Central journal article supplement — Ophthalmol Ther. 2024 Jan 10;13(3):739–59. doi: 10.1007/s40123-023-00875-x (PMC10853097; doi:10.1007/s40123-023-00875-x), 2024-01-10
Supplement: 40123_2023_875_MOESM1_ESM.pdf [file 40123_2023_875_MOESM1_ESM.pdf]

## Supplementary Materials

### **The Effects of Repeated Low-Level Red-Light Therapy on the Structure and Vasculature of the Choroid and Retina in Children with Premyopia**

Zhuzhu Liu<sup>1#</sup>, Ziwen Sun<sup>1#</sup>, Bei Du<sup>1</sup>, Huaixue Gou<sup>1</sup>, Biying Wang<sup>1</sup>, Zeya Lin<sup>1</sup>, Nuo Ren<sup>1</sup>,  
Emmanuel Eric Pazo<sup>1</sup>, Lin Liu<sup>1\*</sup>, Ruihua Wei<sup>1\*</sup>

<sup>1</sup> Tianjin Key Laboratory of Retinal Functions and Diseases, Tianjin Branch of National Clinical Research Center for Ocular Disease, Eye Institute and School of Optometry, Tianjin Medical University Eye Hospital, Tianjin, China.

# Zhuzhu Liu and Ziwen Sun contributed equally to this work and share first authorship.

\*Correspondence:

Lin Liu, Email: [liulin\\_117@126.com](mailto:liulin_117@126.com)

Ruihua Wei, Email: [rwei@tmu.edu.cn](mailto:rwei@tmu.edu.cn)

## **Supplementary Materials Content**

**Figure S1.** Effect of RLRL Intervention on Myopia Incidence

**Figure S2.** Macular regions according to the Early Treatment of Diabetic Retinopathy Study.

**Figure S3.** The value of the microcirculation parameters were calculated automatically by the system

**Figure S4.** The value of the choroidal microvascular parameters were calculated automatically by the system: choroidal vessel volume (CVV).

**Table S1.** Cumulative adjusted mean changes in retinal structure across the entire macular region against different time points in the control group and repeated low-level red-light

(RLRL) groups

**Table S2.** Cumulative adjusted mean changes in retina vascular parameters across the entire macular region against different time points in the control group and repeated low-level red-

light (RLRL) groups

**Table S3.** Cumulative adjusted mean changes in axial length and cycloplegic spherical equivalent refraction against different time points in the control group and repeated low-level

red-light (RLRL) groups

**Table S4.** Cumulative adjusted mean changes in anterior segment parameters against different time points in the control group and repeated low-level red-light (RLRL) groups

This supplementary material has been provided by the authors to give readers additional information about their work.

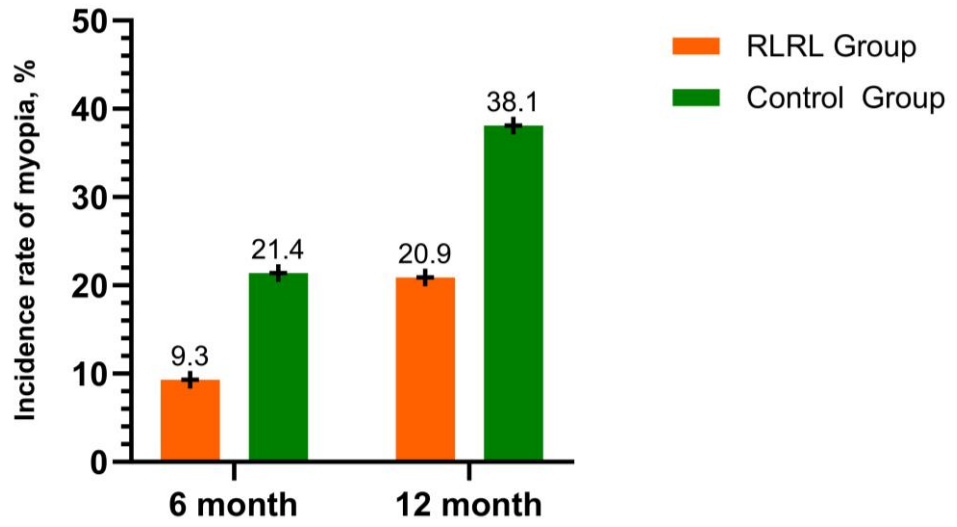

**Figure S1.** Effect of RLRL Intervention on Myopia Incidence

*RLRL*, repeated low-level red-light

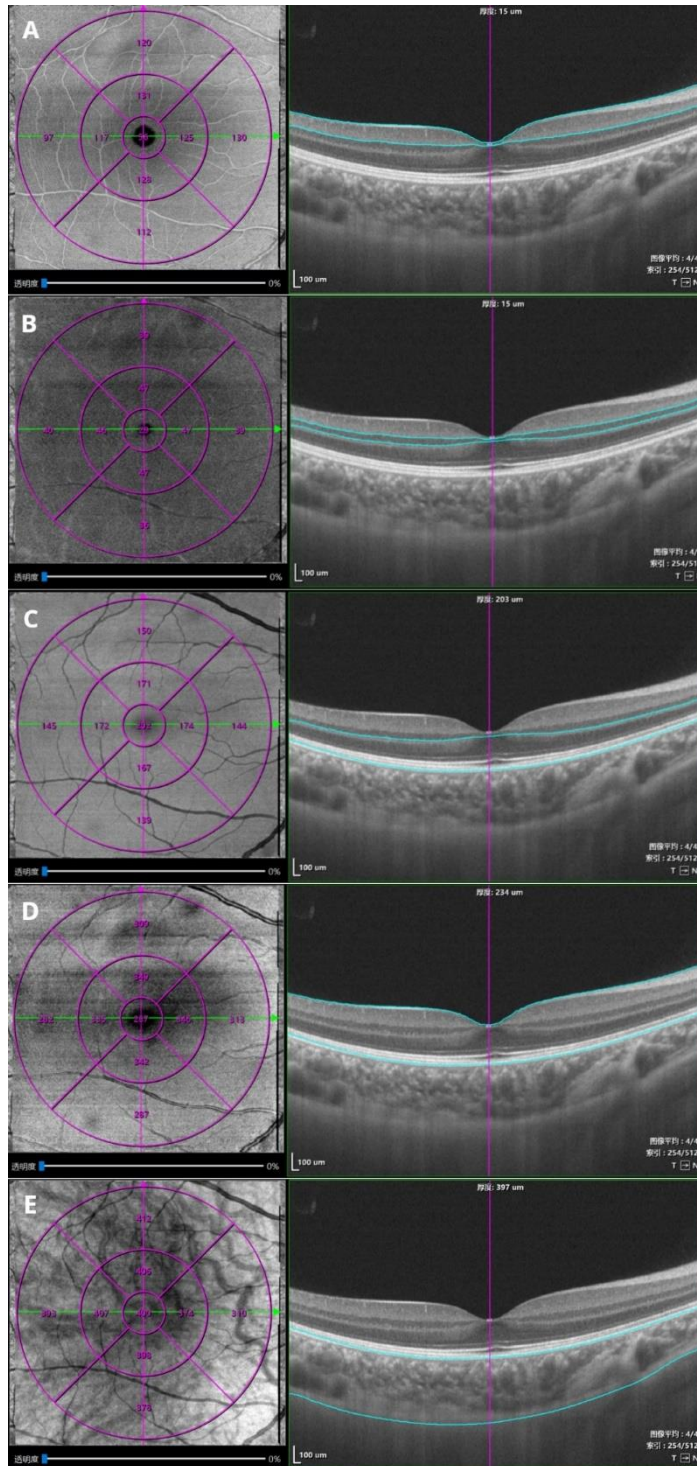

**Figure S2.** Segmentation of retinal layers and choroidal layers. Using SS-OCT/OCT-A, swept-source Optical Coherence Tomography/Optical Coherence Tomography Angiography, the cross sectional image was centered on the fovea: the foveal region, the parafoveal region (ParaF) and the perifoveal region (PeriF). (A)The ganglion cell complex thickness (GCCT) was moved perpendicularly from the inner edge of the nerve fiber layer (NFL) to the outer edge of the inner plexiform layer (IPL). (B)The inner nuclear layer thickness (INLT) was moved perpendicularly from the inner to the outer edge of the INL. (C)The thickness of the outer retinal layer (ORLT) was measured from the inner edge of the outer plexiform layer

(OPL) to the outer edge of the RPE/Bruch's membrane complex.(D) RT was defined as the vertical distance between the internal limiting membrane and the retinal pigment epithelium. (E) CT was defined as the vertical distance between the outer edge of the retinal pigment epithelium (RPE) and the outer edge of the choroid.

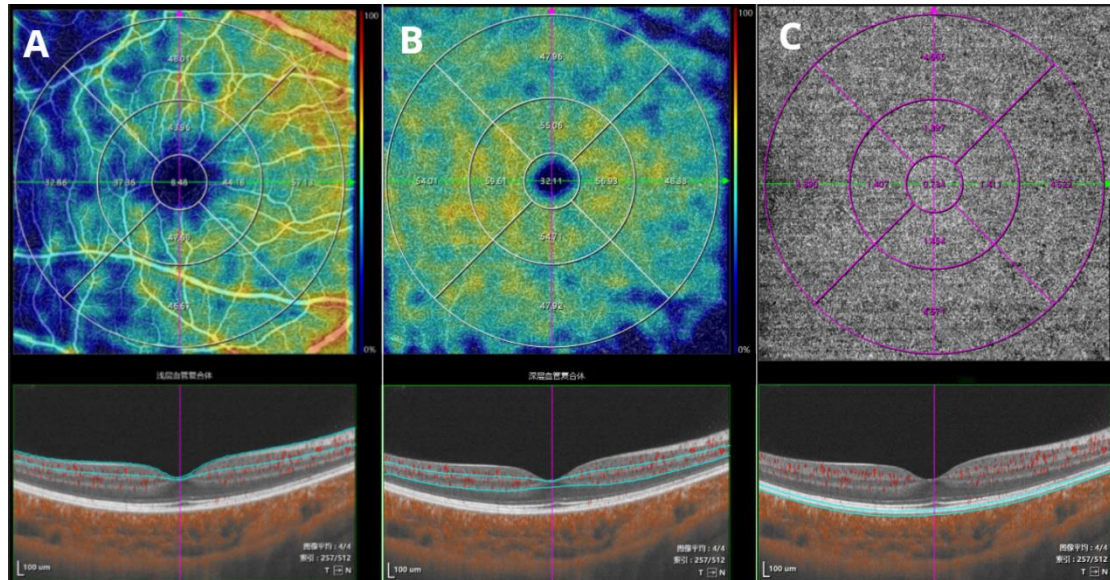

**Figure S3.** The value of the microcirculation parameters were calculated automatically by the system. (A) The superficial retinal vascular density (SRVD) was automatically defined by the system as inner boundary membrane to 1/3 cell complex layer, included radioactive capillary network and shallow capillary network. (B) The deep retinal vascular density (DRVD) was automatically defined by the system as 1/3 cell complex layer to the outer plexus layer, included middle capillary network and deep capillary network. (C) The choriocapillaris perfusion area (CCPA) was automatically defined by the system as the portion from the outer boundary of the RPE-Bruch's membrane complex to about 20  $\mu\text{m}$  below the boundary. *RPE*, retinal pigment epithelium

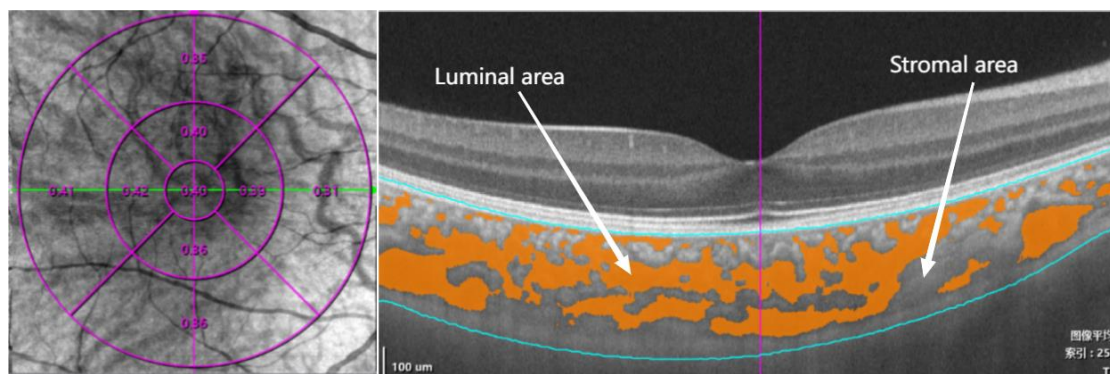

**Figure S4.** The value of the choroidal microvascular parameters were calculated automatically by the system: choroidal vessel volume (CVV).

**Table S1.** Cumulative adjusted mean changes in retinal structure across the entire macular region against different time points in the control group and RLRL groups

| Time/visit                   | Cumulative adjusted mean changes |                    | P value |
|------------------------------|----------------------------------|--------------------|---------|
|                              | RLRL group                       | CONTROL group      |         |
| <b>Change of RT-Fovea,μm</b> |                                  |                    |         |
| 1 months                     |                                  |                    | 0.706   |
| Mean±Std                     | 0.12±2.90                        | -0.72±10.11        |         |
| Median(P25,P75)              | -0.09(-1.55,2.02)                | 0.14(-3.12,1.75)   |         |
| 3 months                     |                                  |                    | 0.662   |
| Mean±Std                     | -0.23±3.54                       | 0.43±9.90          |         |
| Median(P25,P75)              | 0.38(-2.01,1.25)                 | 0.54(-2.71,3.77)   |         |
| 6 months                     |                                  |                    | 0.833   |
| Mean±Std                     | 0.65±3.18                        | 0.63±10.44         |         |
| Median(P25,P75)              | 0.43(-1.37,2.12)                 | 0.67(-2.58,2.46)   |         |
| 9 months                     |                                  |                    | 0.101   |
| Mean±Std                     | 0.75±3.33                        | -0.52±11.73        |         |
| Median(P25,P75)              | 0.91(-1.26,2.55)                 | -1.04(-4.11,2.65)  |         |
| 12 months                    |                                  |                    | 0.335   |
| Mean±Std                     | -1.72±4.14                       | -2.97±11.82        |         |
| Median(P25,P75)              | -2.54(-3.96,0.84)                | -2.71(-5.98,-0.05) |         |

| Time/visit                   | Cumulative adjusted mean changes |                    | P value |
|------------------------------|----------------------------------|--------------------|---------|
|                              | RLRL group                       | CONTROL group      |         |
| <b>Change of RT-ParaF,µm</b> |                                  |                    |         |
| 1 months                     |                                  |                    | 0.418   |
| Mean±Std                     | 0.66±2.39                        | 0.54±5.29          |         |
| Median(P25,P75)              | 0.70(-1.03,2.44)                 | 0.23(-1.29,1.11)   |         |
| 3 months                     |                                  |                    | 0.489   |
| Mean±Std                     | 0.32±2.82                        | 0.40±5.22          |         |
| Median(P25,P75)              | 0.38(-0.84,2.47)                 | -0.54(-2.90,3.30)  |         |
| 6 months                     |                                  |                    | 0.010*  |
| Mean±Std                     | 0.83±2.92                        | -0.25±5.10         |         |
| Median(P25,P75)              | 0.69(-0.56,2.47)                 | -1.04(-3.33,0.42)  |         |
| 9 months                     |                                  |                    | <0.001* |
| Mean±Std                     | 0.19±2.98#                       | -2.82±5.73         |         |
| Median(P25,P75)              | -0.07(-1.40,2.26)#               | -4.25(-6.22,0.02)  |         |
| 12 months                    |                                  |                    | 0.019*  |
| Mean±Std                     | -2.10±4.15                       | -3.70±4.87         |         |
| Median(P25,P75)              | -2.03(-5.16,-0.10)               | -5.07(-6.29,-3.36) |         |
| <b>Change of RT-PeriF,µm</b> |                                  |                    |         |
| 1 months                     |                                  |                    | 0.159   |
| Mean±Std                     | 0.42±2.37                        | -0.62±2.49         |         |

| Time/visit                      | Cumulative adjusted mean changes |                     | P value |
|---------------------------------|----------------------------------|---------------------|---------|
|                                 | RLRL group                       | CONTROL group       |         |
| Median(P25,P75)                 | 0.20(-1.02,2.27)                 | 0.10(-1.70,1.11)    |         |
| 3 months                        |                                  |                     | 0.006*  |
| Mean±Std                        | 0.50±2.24                        | -1.28±3.19#         |         |
| Median(P25,P75)                 | 0.66(-1.01,2.33)                 | -1.43(-3.30,1.13)#  |         |
| 6 months                        |                                  |                     | 0.003*  |
| Mean±Std                        | -0.25±2.76                       | -2.24±2.99#         |         |
| Median(P25,P75)                 | -0.06(-1.42,1.45)                | -2.90(-4.12,0.06)#  |         |
| 9 months                        |                                  |                     | <0.001* |
| Mean±Std                        | -0.64±3.26                       | -4.50±3.75#         |         |
| Median(P25,P75)                 | -0.76(-2.48,1.52)                | -4.24(-6.31,-2.15)# |         |
| 12 months                       |                                  |                     | 0.022*  |
| Mean±Std                        | -2.51±3.69                       | -4.35±3.19#         |         |
| Median(P25,P75)                 | -2.25(-5.45,0.38)                | -4.57(-6.30,-2.26)# |         |
| <b>Change of ORLT -Fovea,µm</b> |                                  |                     |         |
| Mean change over 1 month        |                                  |                     | 0.257   |
| Mean±Std                        | 0.49±2.62                        | 0.72±5.40           |         |
| Median(P25,P75)                 | 0.09(-1.14,1.88)                 | -0.59(-1.68,1.02)   |         |
| Mean change over 3 month        |                                  |                     | 0.757   |
| Mean±Std                        | 0.10±3.69                        | 1.77±6.38#          |         |



| Time/visit                      | Cumulative adjusted mean changes |                    | P value |
|---------------------------------|----------------------------------|--------------------|---------|
|                                 | RLRL group                       | CONTROL group      |         |
| Median(P25,P75)                 | 0.66(-0.63,1.83)                 | -0.10(-1.44,2.38)# |         |
| Mean change over 6 month        |                                  |                    | 0.566   |
| Mean±Std                        | -0.11±2.71                       | 1.26±7.28          |         |
| Median(P25,P75)                 | 0.16(-2.51,1.49)                 | -0.16(-1.55,1.78)  |         |
| Mean change over 9 month        |                                  |                    | 0.350   |
| Mean±Std                        | 0.59±3.19                        | 1.09±8.61          |         |
| Median(P25,P75)                 | 1.02(-1.71,2.55)                 | -0.13(-1.98,1.80)  |         |
| Mean change over 12 month       |                                  |                    | 0.365   |
| Mean±Std                        | 0.07±3.11                        | 2.05±7.69          |         |
| Median(P25,P75)                 | -0.80(-1.88,2.06)                | 0.19(-1.18,1.27)   |         |
| <b>Change of ORLT -ParaF,µm</b> |                                  |                    |         |
| Mean change over 1 month        |                                  |                    | 0.081   |
| Mean±Std                        | 1.03±1.75#                       | 0.41±2.03          |         |
| Median(P25,P75)                 | 1.16(-0.24,2.24)#                | 0.01(-0.93,1.29)   |         |
| Mean change over 3 month        |                                  |                    | 0.359   |
| Mean±Std                        | 0.26±2.30                        | 0.05±2.30          |         |
| Median(P25,P75)                 | 0.36(-0.89,1.57)                 | -0.34(-1.80,1.27)  |         |
| Mean change over 6 month        |                                  |                    | 0.123   |
| Mean±Std                        | 0.17±2.06                        | -0.60±2.30         |         |

| Time/visit                      | Cumulative adjusted mean changes |                     | P value |
|---------------------------------|----------------------------------|---------------------|---------|
|                                 | RLRL group                       | CONTROL group       |         |
| Median(P25,P75)                 | -0.09(-1.18,1.21)                | -0.79(-2.10,0.03)   |         |
| Mean change over 9 month        |                                  |                     | <0.001* |
| Mean±Std                        | 0.01±1.73                        | -2.18±3.29#         |         |
| Median(P25,P75)                 | 0.02(-1.29,1.20)                 | -2.09(-3.83,-0.59)# |         |
| Mean change over 12 month       |                                  |                     | 0.489   |
| Mean±Std                        | -2.13±2.93                       | -2.58±2.45#         |         |
| Median(P25,P75)                 | -2.03(-4.08,-0.27)               | -2.12(-4.56,-1.23)# |         |
| <b>Change of ORLT -PeriF,µm</b> |                                  |                     |         |
| Mean change over 1 month        |                                  |                     | 0.148   |
| Mean±Std                        | 0.77±2.53#                       | -0.12±1.75          |         |
| Median(P25,P75)                 | 0.55(-0.79,2.01)#                | 0.09(-0.83,0.95)    |         |
| Mean change over 3 month        |                                  |                     | 0.022*  |
| Mean±Std                        | 0.74±1.92#                       | -0.28±1.96          |         |
| Median(P25,P75)                 | 0.80(-0.44,1.62)#                | -0.43(-1.64,0.81)   |         |
| Mean change over 6 month        |                                  |                     | 0.001*  |
| Mean±Std                        | 0.36±2.01                        | -1.11±1.93#         |         |
| Median(P25,P75)                 | 0.27(-0.75,1.13)                 | -1.30(-2.60,0.23)#  |         |
| Mean change over 9 month        |                                  |                     | <0.001* |
| Mean±Std                        | 0.40±2.38                        | -2.09±1.95#         |         |

| Time/visit                     | Cumulative adjusted mean changes |                     | P value |
|--------------------------------|----------------------------------|---------------------|---------|
|                                | RLRL group                       | CONTROL group       |         |
| Median(P25,P75)                | 0.38(-0.47,1.66)                 | -2.03(-3.34,-0.64)# |         |
| Mean change over 12 month      |                                  |                     | 0.010*  |
| Mean±Std                       | -0.89±2.63                       | -2.35±1.92#         |         |
| Median(P25,P75)                | -0.72(-2.43,0.53)                | -2.48(-3.70,-1.10)# |         |
| <b>Change of INL-Fovea, μm</b> |                                  |                     |         |
| Mean change over 1 month       |                                  |                     | 0.895   |
| Mean±Std                       | -0.18±1.23                       | -0.60±2.60          |         |
| Median(P25,P75)                | -0.03(-0.98,0.52)                | -0.13(-0.72,0.34)   |         |
| Mean change over 3 month       |                                  |                     | 0.887   |
| Mean±Std                       | -0.17±1.15                       | -0.65±2.54#         |         |
| Median(P25,P75)                | -0.33(-0.90,0.49)                | -0.28(-0.93,0.59)#  |         |
| Mean change over 6 month       |                                  |                     | 0.151   |
| Mean±Std                       | 0.41±1.27                        | -0.36±2.42          |         |
| Median(P25,P75)                | 0.27(-0.10,0.75)                 | 0.04(-0.56,0.61)    |         |
| Mean change over 9 month       |                                  |                     | 0.299   |
| Mean±Std                       | 0.24±1.00                        | -0.07±3.36          |         |
| Median(P25,P75)                | 0.33(-0.53,0.81)                 | -0.08(-0.45,0.66)   |         |
| Mean change over 12 month      |                                  |                     | 0.014   |
| Mean±Std                       | 0.45±1.21#                       | -0.58±2.63          |         |

| Time/visit                                           | Cumulative adjusted mean changes |                   | P value |
|------------------------------------------------------|----------------------------------|-------------------|---------|
|                                                      | RLRL group                       | CONTROL group     |         |
| Median(P25,P75)                                      | 0.52(-0.22,1.39)#                | 0.02(-1.38,0.36)  |         |
| <b>Change of INL-ParaF, <math>\mu\text{m}</math></b> |                                  |                   |         |
| Mean change over 1 month                             |                                  |                   | 0.646   |
| Mean $\pm$ Std                                       | -0.41 $\pm$ 2.09                 | -0.21 $\pm$ 1.77  |         |
| Median(P25,P75)                                      | -0.31(-1.95,0.76)                | -0.11(-1.03,0.93) |         |
| Mean change over 3 month                             |                                  |                   | 0.979   |
| Mean $\pm$ Std                                       | -0.06 $\pm$ 1.60                 | -0.07 $\pm$ 1.74  |         |
| Median(P25,P75)                                      | -0.08(-1.23,0.98)                | -0.36(-1.21,1.18) |         |
| Mean change over 6 month                             |                                  |                   | 0.308   |
| Mean $\pm$ Std                                       | 0.35 $\pm$ 1.73                  | -0.05 $\pm$ 1.74  |         |
| Median(P25,P75)                                      | 0.59(-0.58,1.35)                 | 0.01(-0.84,0.43)  |         |
| Mean change over 9 month                             |                                  |                   | 0.407   |
| Mean $\pm$ Std                                       | 0.18 $\pm$ 1.49                  | -0.14 $\pm$ 1.80  |         |
| Median(P25,P75)                                      | -0.01(-1.03,1.21)                | -0.10(-1.63,0.63) |         |
| Mean change over 12 month                            |                                  |                   | 0.002*  |
| Mean $\pm$ Std                                       | 0.92 $\pm$ 2.13#                 | -0.74 $\pm$ 2.37  |         |
| Median(P25,P75)                                      | 0.56(-0.35,2.54)#                | -0.98(-2.17,0.26) |         |
| <b>Change of INL-PeriF, <math>\mu\text{m}</math></b> |                                  |                   |         |
| Mean change over 1 month                             |                                  |                   | 0.750   |

| Time/visit                     | Cumulative adjusted mean changes |                    | P value |
|--------------------------------|----------------------------------|--------------------|---------|
|                                | RLRL group                       | CONTROL group      |         |
| Mean±Std                       | -0.14±1.40                       | -0.21±1.06         |         |
| Median(P25,P75)                | -0.44(-0.92,0.55)                | -0.04(-0.95,0.50)  |         |
| Mean change over 3 month       |                                  |                    | 0.048*  |
| Mean±Std                       | 0.05±1.28                        | -0.46±0.96#        |         |
| Median(P25,P75)                | -0.19(-0.75,0.67)                | -0.37(-1.14,0.25)# |         |
| Mean change over 6 month       |                                  |                    | 0.146   |
| Mean±Std                       | -0.01±1.16                       | -0.37±1.03         |         |
| Median(P25,P75)                | -0.13(-0.59,0.92)                | -0.44(-1.07,0.35)  |         |
| Mean change over 9 month       |                                  |                    | 0.280   |
| Mean±Std                       | 0.03±1.27                        | -0.27±1.10         |         |
| Median(P25,P75)                | -0.15(-0.87,0.81)                | -0.23(-0.83,0.66)  |         |
| Mean change over 12 month      |                                  |                    | 0.003*  |
| Mean±Std                       | 0.47±1.36                        | -0.43±1.03#        |         |
| Median(P25,P75)                | 0.25(-0.62,1.25)                 | -0.29(-1.06,0.17)# |         |
| <b>Change of RNFL+GCL+IPL-</b> |                                  |                    |         |
| <b>Fovea, μm</b>               |                                  |                    |         |
| Mean change over 1 month       |                                  |                    | 0.677   |
| Mean±Std                       | -0.19±1.92                       | -0.83±6.98         |         |
| Median(P25,P75)                | 0.06(-1.01,1.31)                 | 0.18(-0.93,1.10)   |         |

| Time/visit                     | Cumulative adjusted mean changes |                    | P value |
|--------------------------------|----------------------------------|--------------------|---------|
|                                | RLRL group                       | CONTROL group      |         |
| Mean change over 3 month       |                                  |                    | 0.465   |
| Mean±Std                       | -0.14±2.02                       | -0.69±7.06         |         |
| Median(P25,P75)                | 0.31(-1.59,1.47)                 | 0.51(-1.14,1.80)   |         |
| Mean change over 6 month       |                                  |                    | 0.848   |
| Mean±Std                       | 0.35±1.95                        | -0.26±7.05         |         |
| Median(P25,P75)                | 0.63(-0.90,1.54)                 | 0.57(-1.17,1.85)   |         |
| Mean change over 9 month       |                                  |                    | 0.304   |
| Mean±Std                       | -0.08±2.61                       | -1.54±9.74         |         |
| Median(P25,P75)                | 0.86(-1.38,1.37)                 | -0.14(-5.79,1.89)  |         |
| Mean change over 12 month      |                                  |                    | 0.274   |
| Mean±Std                       | -2.22±3.72                       | -4.44±7.69         |         |
| Median(P25,P75)                | -2.42(-5.07,1.20)                | -3.38(-4.94,-1.54) |         |
| <b>Change of RNFL+GCL+IPL-</b> |                                  |                    |         |
| <b>ParaF, μm</b>               |                                  |                    |         |
| Mean change over 1 month       |                                  |                    | 0.795   |
| Mean±Std                       | 0.03±1.30                        | 0.33±3.39          |         |
| Median(P25,P75)                | -0.24(-0.73,1.05)                | 0.07(-0.88,0.77)   |         |
| Mean change over 3 month       |                                  |                    | 0.780   |
| Mean±Std                       | 0.12±1.31                        | 0.42±2.99          |         |

| Time/visit                     | Cumulative adjusted mean changes |                   | P value |
|--------------------------------|----------------------------------|-------------------|---------|
|                                | RLRL group                       | CONTROL group     |         |
| Median(P25,P75)                | -0.07(-1.03,1.13)                | 0.07(-0.76,1.00)  |         |
| Mean change over 6 month       |                                  |                   | 0.197   |
| Mean±Std                       | 0.30±1.47                        | 0.41±3.06         |         |
| Median(P25,P75)                | 0.54(-0.03,1.40)                 | -0.08(-1.18,1.48) |         |
| Mean change over 9 month       |                                  |                   | 0.107   |
| Mean±Std                       | -0.00±1.59                       | -0.49±3.24        |         |
| Median(P25,P75)                | 0.30(-1.12,1.05)                 | -0.45(-2.18,0.67) |         |
| Mean change over 12 month      |                                  |                   | 0.412   |
| Mean±Std                       | -0.91±2.02                       | -0.38±3.18        |         |
| Median(P25,P75)                | -0.81(-2.72,0.64)                | -0.53(-2.80,1.03) |         |
| <b>Change of RNFL+GCL+IPL-</b> |                                  |                   |         |
| <b>PeriF, μm</b>               |                                  |                   |         |
| Mean change over 1 month       |                                  |                   | 0.818   |
| Mean±Std                       | -0.21±1.76                       | -0.30±1.46        |         |
| Median(P25,P75)                | -0.09(-0.72,0.96)                | -0.08(-1.27,0.53) |         |
| Mean change over 3 month       |                                  |                   | 0.465   |
| Mean±Std                       | -0.29±1.66                       | -0.54±1.68        |         |
| Median(P25,P75)                | -0.28(-1.20,0.60)                | -0.36(-1.59,0.56) |         |
| Mean change over 6 month       |                                  |                   | 0.339   |

| Time/visit                | Cumulative adjusted mean changes |                    | P value |
|---------------------------|----------------------------------|--------------------|---------|
|                           | RLRL group                       | CONTROL group      |         |
| Mean±Std                  | -0.60±1.97                       | -0.76±1.69         |         |
| Median(P25,P75)           | -0.21(-1.54,0.71)                | -0.61(-2.13,0.22)  |         |
| Mean change over 9 month  |                                  |                    | 0.018*  |
| Mean±Std                  | -1.06±2.21                       | -2.14±2.20         |         |
| Median(P25,P75)           | -0.58(-2.41,0.30)                | -2.09(-2.84,-0.79) |         |
| Mean change over 12 month |                                  |                    | 0.347   |
| Mean±Std                  | -2.08±2.28#                      | -1.57±2.22         |         |
| Median(P25,P75)           | -1.75(-3.38,-0.36)#              | -1.65(-3.28,-0.01) |         |

Data are mean ± SD; median (IQR)

Adjusted estimates at each time point were calculated on the basis of GLMM, adjusted for baseline age, gender, group, visit, group \*visit, and corresponding baseline parameter as fixed factors, and subjects as the random factor.

\*Between-group significant differences at  $P < 0.05$

#Within-group significant differences with baseline at  $P < 0.05$

*RT*, retinal thickness of different region; *RNFL*, Retinal Nerve Fiber Layer; *GCL*, ganglion cell layer; *IPL*, inner plexiform layer; *INL*, inner nuclear layer; *ORLT*, Outer retinal layers thickness ; *ParaF*, parafoveal; *PeriF*, perifoveal; *GLMM*, generalized linear mixed model; *SD*, standard deviation; *IQR*, interquartile range



**Table S2.** Cumulative adjusted mean changes in retina vascular parameters across the entire macular region against different time points in the control group and RLRL groups

| Time/visit                       | Cumulative adjusted mean changes |                   | P value |
|----------------------------------|----------------------------------|-------------------|---------|
|                                  | RLRL group                       | CONTROL group     |         |
|                                  | (N=43)                           | (N=42)            |         |
| <b>Change of DRVD-Fovea, (%)</b> |                                  |                   |         |
| 1 months                         |                                  |                   | 0.828   |
| Mean±Std                         | -0.24±4.02                       | -0.04±4.28        |         |
| Median(P25,P75)                  | -0.39(-3.27,2.89)                | 0.35(-2.21,3.15)  |         |
| 3 months                         |                                  |                   | 0.303   |
| Mean±Std                         | -0.31±2.73                       | 0.08±4.52         |         |
| Median(P25,P75)                  | -0.31(-2.60,1.98)                | 0.66(-2.62,2.53)  |         |
| 6 months                         |                                  |                   | 0.101   |
| Mean±Std                         | -0.54±3.52                       | 0.30±5.27         |         |
| Median(P25,P75)                  | -0.01(-2.31,1.90)                | 0.86(-1.77,2.58)  |         |
| 9 months                         |                                  |                   | 0.240   |
| Mean±Std                         | 0.02±3.04                        | 1.00±6.78         |         |
| Median(P25,P75)                  | -0.10(-2.36,1.58)                | 0.51(-1.28,3.20)  |         |
| 12 months                        |                                  |                   | 0.110   |
| Mean±Std                         | 0.16±3.53                        | 1.61±4.4#         |         |
| Median(P25,P75)                  | 0.43(-2.59,2.87)                 | 1.48(-0.83,4.42)# |         |

| Time/visit                       | Cumulative adjusted mean changes |                   | P value |
|----------------------------------|----------------------------------|-------------------|---------|
|                                  | RLRL group                       | CONTROL group     |         |
|                                  | (N=43)                           | (N=42)            |         |
| <b>Change of DRVD-ParaF, (%)</b> |                                  |                   |         |
| 1 months                         |                                  |                   | 0.181   |
| Mean±Std                         | -0.43±3.97                       | 0.24±6.73         |         |
| Median(P25,P75)                  | -0.96(-3.62,2.66)                | 1.68(-2.23,4.08)  |         |
| 3 months                         |                                  |                   | 0.358   |
| Mean±Std                         | -0.87±3.49                       | -0.09±4.39        |         |
| Median(P25,P75)                  | -0.99(-3.55,1.28)                | 0.31(-2.26,3.10)  |         |
| 6 months                         |                                  |                   | 0.112   |
| Mean±Std                         | -1.09±3.01                       | -0.35±5.50        |         |
| Median(P25,P75)                  | -0.48(-3.19,1.25)                | 0.27(-2.56,3.09)  |         |
| 9 months                         |                                  |                   | 0.831   |
| Mean±Std                         | -0.30±2.91                       | -0.14±4.10        |         |
| Median(P25,P75)                  | -0.58(-2.26,1.50)                | 0.48(-2.35,2.65)  |         |
| 12 months                        |                                  |                   | 0.007   |
| Mean±Std                         | -1.08±3.68                       | 1.25±3.83#        |         |
| Median(P25,P75)                  | -0.65(-3.56,1.59)                | 0.84(-1.86,4.39)# |         |
| <b>Change of DRVD-PeriF</b>      |                                  |                   |         |
| 1 months                         |                                  |                   | 0.393   |
| Mean±Std                         | 0.21±4.22                        | 0.99±3.98         |         |

| Time/visit                  | Cumulative adjusted mean changes |                   | P value |
|-----------------------------|----------------------------------|-------------------|---------|
|                             | RLRL group                       | CONTROL group     |         |
|                             | (N=43)                           | (N=42)            |         |
| Median(P25,P75)             | -0.44(-2.84,3.59)                | 0.69(-1.58,3.82)  |         |
| 3 months                    |                                  |                   | 0.939   |
| Mean±Std                    | -0.57±4.61                       | -0.50±4.27        |         |
| Median(P25,P75)             | -1.20(-3.82,2.31)                | -0.33(-3.90,1.94) |         |
| 6 months                    |                                  |                   | 0.982   |
| Mean±Std                    | -0.12±3.95                       | -0.10±4.36        |         |
| Median(P25,P75)             | 0.02(-2.69,2.35)                 | 0.10(-2.79,2.59)  |         |
| 9 months                    |                                  |                   | 0.697   |
| Mean±Std                    | 0.60±4.53                        | 0.50±4.97         |         |
| Median(P25,P75)             | 1.07(-1.18,2.58)                 | 0.99(-0.72,3.54)  |         |
| 12 months                   |                                  |                   | 0.247   |
| Mean±Std                    | 1.72±4.62#                       | 2.38±3.82#        |         |
| Median(P25,P75)             | 0.91(-1.20,3.89)#                | 2.14(-0.34,5.03)# |         |
| <b>Change of SRVD-Fovea</b> |                                  |                   |         |
| 1 months                    |                                  |                   | 0.397   |
| Mean±Std                    | 0.10±2.40                        | -0.50±3.11        |         |
| Median(P25,P75)             | 0.28(-0.96,1.96)                 | -0.09(-2.13,1.27) |         |
| 3 months                    |                                  |                   | 0.433   |
| Mean±Std                    | -0.20±2.18                       | -0.12±2.94        |         |

| Time/visit                  | Cumulative adjusted mean changes |                   | P value |
|-----------------------------|----------------------------------|-------------------|---------|
|                             | RLRL group                       | CONTROL group     |         |
|                             | (N=43)                           | (N=42)            |         |
| Median(P25,P75)             | -0.21(-2.03,1.29)                | 0.41(-0.89,1.62)  |         |
| 6 months                    |                                  |                   | 0.591   |
| Mean±Std                    | -0.14±2.38                       | -0.29±3.85        |         |
| Median(P25,P75)             | 0.08(-1.81,1.41)                 | 0.46(-0.84,1.87)  |         |
| 9 months                    |                                  |                   | 0.938   |
| Mean±Std                    | 0.55±2.32                        | 0.67±3.46         |         |
| Median(P25,P75)             | 0.99(-0.64,2.38)                 | 0.66(-0.92,1.83)  |         |
| 12 months                   |                                  |                   | 0.723   |
| Mean±Std                    | 0.74±2.57                        | 0.77±3.09         |         |
| Median(P25,P75)             | 0.71(-0.80,2.93)                 | 0.71(-0.06,2.01)  |         |
| <b>Change of SRVD-ParaF</b> |                                  |                   |         |
| 1 months                    |                                  |                   | 0.181   |
| Mean±Std                    | -1.19±4.91                       | 0.14±4.36         |         |
| Median(P25,P75)             | -1.42(-3.57,2.02)                | -0.13(-2.69,2.60) |         |
| 3 months                    |                                  |                   | 0.126   |
| Mean±Std                    | -1.00±4.36                       | 0.46±4.80         |         |
| Median(P25,P75)             | -0.38(-4.70,1.39)                | -0.12(-1.48,2.60) |         |
| 6 months                    |                                  |                   | 0.649   |
| Mean±Std                    | 0.02±3.61                        | 0.14±5.31         |         |

| Time/visit                  | Cumulative adjusted mean changes |                    | P value |
|-----------------------------|----------------------------------|--------------------|---------|
|                             | RLRL group                       | CONTROL group      |         |
|                             | (N=43)                           | (N=42)             |         |
| Median(P25,P75)             | -0.33(-2.81,2.53)                | 0.16(-2.43,2.88)   |         |
| 9 months                    |                                  |                    | 0.233   |
| Mean±Std                    | 0.25±3.49                        | 1.33±4.36#         |         |
| Median(P25,P75)             | 0.81(-1.93,2.11)                 | 1.39(-0.75,2.95)#  |         |
| 12 months                   |                                  |                    | 0.009*  |
| Mean±Std                    | 1.10±4.30                        | 3.79±4.75#         |         |
| Median(P25,P75)             | 1.93(-1.62,3.37)                 | 3.53(0.04,7.10)#   |         |
| <b>Change of SRVD-PeriF</b> |                                  |                    |         |
| 1 months                    |                                  |                    | 0.828   |
| Mean±Std                    | -0.29±3.03                       | -0.15±2.65         |         |
| Median(P25,P75)             | -0.27(-2.02,1.36)                | -0.22(-1.54,0.89)  |         |
| 3 months                    |                                  |                    | 0.552   |
| Mean±Std                    | -0.51±3.13                       | -0.90±2.98#        |         |
| Median(P25,P75)             | -0.21(-3.16,1.34)                | -0.97(-2.34,0.01)# |         |
| 6 months                    |                                  |                    | 0.498   |
| Mean±Std                    | -0.27±2.51                       | -0.42±2.44         |         |
| Median(P25,P75)             | 0.05(-2.13,1.68)                 | -0.26(-2.02,1.21)  |         |
| 9 months                    |                                  |                    | 0.381   |
| Mean±Std                    | 0.08±2.41                        | -0.38±2.50         |         |

| Time/visit      | Cumulative adjusted mean changes |                   | P value |
|-----------------|----------------------------------|-------------------|---------|
|                 | RLRL group                       | CONTROL group     |         |
|                 | (N=43)                           | (N=42)            |         |
| Median(P25,P75) | 0.59(-1.07,1.50)                 | -0.66(-1.67,1.18) |         |
| 12 months       |                                  |                   | 0.002*  |
| Mean±Std        | -0.35±2.27                       | 1.56±3.02#        |         |
| Median(P25,P75) | -0.14(-1.60,0.86)                | 1.20(0.45,3.21)#  |         |

Data are mean ± SD; median (IQR)

Adjusted estimates at each time point were calculated on the basis of GLMM, adjusted for baseline age, gender, group, visit, group \*visit, and corresponding baseline parameter as fixed factors, and subjects as the random factor.

\*Between-group significant differences at  $P < 0.05$

#Within-group significant differences with baseline at  $P < 0.05$

*RLRL*, repeated low-level red-light; *SRVD*, superficial retinal vascular density; *DRVD*, deep retinal vascular density; *ParaF*, parafoveal; *PeriF*, perifoveal; *SD*, standard deviation; *IQR*, interquartile range

**Table S3.** Cumulative adjusted mean changes in axial length and cycloplegic spherical equivalent refraction against different time points in the control group and RLRL groups

| Time/visit              | Cumulative adjusted mean changes |                         | P value |
|-------------------------|----------------------------------|-------------------------|---------|
|                         | RLRL group<br>(N=43)             | CONTROL group<br>(N=42) |         |
| <b>Change of AL, mm</b> |                                  |                         |         |
| 1 months                |                                  |                         | <0.001* |
| Mean±Std                | -0.02±0.04#                      | 0.02±0.03#              |         |
| Median(P25,P75)         | -0.01(-0.04,0.00)#               | 0.02(0.00,0.04)#        |         |
| 3 months                |                                  |                         | <0.001* |
| Mean±Std                | -0.01±0.07                       | 0.07±0.06#              |         |
| Median(P25,P75)         | -0.01(-0.05,0.03)                | 0.05(0.03,0.09)#        |         |
| 6 months                |                                  |                         | <0.001* |
| Mean±Std                | 0.03±0.11                        | 0.14±0.08#              |         |
| Median(P25,P75)         | 0.02(-0.03,0.09)                 | 0.13(0.07,0.20)#        |         |
| 9 months                |                                  |                         | <0.001* |
| Mean±Std                | 0.06±0.14#                       | 0.21±0.09#              |         |
| Median(P25,P75)         | 0.05(-0.01,0.16)#                | 0.20(0.14,0.31)#        |         |
| 12 months               |                                  |                         | <0.001* |
| Mean±Std                | 0.09±0.21                        | 0.28±0.12#              |         |
| Median(P25,P75)         | 0.09(-0.01,0.19)                 | 0.32(0.16,0.39)#        |         |
| <b>Change of SE, D</b>  |                                  |                         |         |

|                 |                   |                     |        |
|-----------------|-------------------|---------------------|--------|
| 6 months        |                   |                     | 0.004* |
| Mean±Std        | 0.03±0.37         | -0.21±0.35#         |        |
| Median(P25,P75) | 0.00(-0.25,0.25)  | -0.19(-0.50,0.00)#  |        |
| 12 months       |                   |                     | 0.002* |
| Mean±Std        | -0.11±0.44        | -0.42±0.36#         |        |
| Median(P25,P75) | -0.13(-0.50,0.25) | -0.38(-0.63,-0.13)# |        |

---

Data are mean ± SD; median (IQR)

Adjusted estimates at each time point were calculated on the basis of GLMM, adjusted for baseline age, gender, group, visit, group \*visit, and corresponding baseline parameter as fixed factors, and subjects as the random factor.

\*Between-group significant differences at  $P < 0.05$

#Within-group significant differences with baseline at  $P < 0.05$

*RLRL*, repeated low-level red-light; *AL*, axial length; *SE*, spherical equivalent



**Table S4.** Cumulative adjusted mean changes in anterior segment parameters against different time points in the control group and RLRL groups

| Time/visit               | Cumulative adjusted mean changes |                         | P value |
|--------------------------|----------------------------------|-------------------------|---------|
|                          | RLRL group<br>(N=43)             | CONTROL group<br>(N=42) |         |
| <b>Change of ACD, mm</b> |                                  |                         |         |
| 1 months                 |                                  |                         | 0.676   |
| Mean±Std                 | -0.04±0.07#                      | -0.04±0.10#             |         |
| Median(P25,P75)          | -0.03(-0.08,0.00)#               | -0.05(-0.11,0.00)#      |         |
| 3 months                 |                                  |                         | 0.526   |
| Mean±Std                 | -0.03±0.09#                      | -0.04±0.10#             |         |
| Median(P25,P75)          | -0.02(-0.07,0.03)#               | -0.04(-0.11,0.02)#      |         |
| 6 months                 |                                  |                         | 0.889   |
| Mean±Std                 | -0.02±0.07                       | -0.02±0.09              |         |
| Median(P25,P75)          | 0.00(-0.06,0.03)                 | -0.02(-0.07,0.04)       |         |
| 9 months                 |                                  |                         | 0.908   |
| Mean±Std                 | -0.00±0.07                       | -0.01±0.10              |         |
| Median(P25,P75)          | 0.00(-0.06,0.04)                 | -0.01(-0.08,0.06)       |         |
| 12 months                |                                  |                         | 0.805   |
| Mean±Std                 | -0.01±0.08                       | -0.00±0.11#             |         |
| Median(P25,P75)          | -0.01(-0.05,0.04)                | 0.00(-0.07,0.08)#       |         |
| <b>Change of Kf, D</b>   |                                  |                         |         |

|                        |                    |                   |       |
|------------------------|--------------------|-------------------|-------|
| 1 months               |                    |                   | 0.864 |
| Mean±Std               | -0.01±0.11         | -0.01±0.15        |       |
| Median(P25,P75)        | -0.02(-0.06,0.04)  | 0.01(-0.06,0.07)  |       |
| 3 months               |                    |                   | 0.169 |
| Mean±Std               | -0.01±0.12         | 0.02±0.17         |       |
| Median(P25,P75)        | -0.02(-0.06,0.05)  | 0.03(-0.06,0.08)  |       |
| 6 months               |                    |                   | 0.132 |
| Mean±Std               | 0.02±0.14          | -0.02±0.14        |       |
| Median(P25,P75)        | 0.00(-0.05,0.09)   | -0.02(-0.12,0.06) |       |
| 9 months               |                    |                   | 0.718 |
| Mean±Std               | -0.05±0.24#        | -0.02±0.20        |       |
| Median(P25,P75)        | -0.02(-0.10,0.08)# | 0.00(-0.07,0.05)  |       |
| 12 months              |                    |                   | 0.842 |
| Mean±Std               | -0.03±0.11         | -0.02±0.19        |       |
| Median(P25,P75)        | -0.03(-0.10,0.04)  | -0.03(-0.11,0.07) |       |
| <b>Change of LT,mm</b> |                    |                   |       |
| 1 months               |                    |                   | 0.996 |
| Mean±Std               | 0.02±0.06          | -0.08±0.59        |       |
| Median(P25,P75)        | 0.02(-0.01,0.04)   | 0.02(-0.01,0.05)  |       |
| 3 months               |                    |                   | 0.753 |
| Mean±Std               | -0.08±0.61         | 0.18±0.77         |       |
| Median(P25,P75)        | 0.00(-0.02,0.04)   | 0.01(-0.02,0.06)  |       |

|                 |                   |                    |       |
|-----------------|-------------------|--------------------|-------|
| 6 months        |                   |                    | 0.798 |
| Mean±Std        | -0.00±0.06        | 0.08±1.24          |       |
| Median(P25,P75) | 0.00(-0.05,0.02)  | 0.01(-0.06,0.04)   |       |
| 9 months        |                   |                    | 0.524 |
| Mean±Std        | -0.00±0.07        | 0.27±0.95#         |       |
| Median(P25,P75) | 0.00(-0.04,0.05)  | 0.01(-0.04,0.06)#  |       |
| 12 months       |                   |                    | 0.423 |
| Mean±Std        | -0.11±0.54        | -0.41±1.12#        |       |
| Median(P25,P75) | -0.03(-0.07,0.03) | -0.01(-0.11,0.01)# |       |

---

Data are mean ± SD; median (IQR);

Adjusted estimates at each time point were calculated on the basis of GLMM, adjusted for baseline age, gender, group, visit, group \*visit, and corresponding baseline parameter as fixed factors, and subjects as the random factor.

\*Between-group significant differences at  $P < 0.05$

#Within-group significant differences with baseline at  $P < 0.05$

*RLRL*, repeated low-level red-light; *ACD*, anterior chamber depth; *Kf*, flat keratometry; *LT*, lens thickness; *D*, diopter; *SD*, standard deviation; *IQR*, interquartile range; *GLMM*, generalized linear mixed model
